# Supplementary material for: Geometric Morphometric Wing Analysis of Avian Malaria Vector, Culiseta longiareolata, from Two Locations in Algeria
Source: MDPI journal article supplement (doi:10.3390/insects13111031), 2022-11-08
Supplement: s1 [file s1]

**Supplemental Table S1.** Information of *Cs. Longiareolata* mosquito samples from each study area. The weather data from the actual sampling year, altitude, geographic coordinates, type of climate, type of habitat, and the number of mosquito individuals per sex.

| District                            |       | T<br>(°C) | R<br>(mm) | A<br>(m) | Geographic coordinates |             | Climate   | Larval<br>habitat<br>type | Number of<br>mosquito<br>samples |        |
|-------------------------------------|-------|-----------|-----------|----------|------------------------|-------------|-----------|---------------------------|----------------------------------|--------|
|                                     |       |           |           |          | North                  | East        |           |                           | Male                             | Female |
| <b>GUELMA<br/>(AinMakhlouf)</b>     | AM01  | 15,3      | 502,1     | 791      | 36°15'30.93"           | 7°16'38.61" | Sub-arid  | Natural                   | 08                               | 35     |
|                                     | AM02  | 15,3      | 502,1     | 818      | 36°12'42.03"           | 7°12'57.75" |           |                           |                                  |        |
|                                     | AM03  | 15,3      | 502,1     | 846      | 36°14'12.37"           | 7°14'49.38" |           |                           |                                  |        |
|                                     | AM07  | 15,3      | 502,1     | 863      | 36°16'54.05"           | 7°16'50.22" |           | Artificial                | 20                               | 28     |
|                                     | AM04  | 15,3      | 502,1     | 825      | 36°14'22.61"           | 7°15'03.43" |           |                           |                                  |        |
|                                     | AM05  | 15,3      | 502,1     | 825      | 36°14'50.10"           | 7°15'08.56" |           |                           |                                  |        |
| <b>ANNABA<br/>&amp;<br/>EL TARF</b> | CH 01 | 17,2      | 947,3     | 65       | 36°41'43.43"           | 7°34'12.84" | Sub-humid | Natural                   | 18                               | 38     |
|                                     | AS01  | 17,2      | 947,3     | 55       | 36°41'25.24"           | 7°39'07.83" |           |                           |                                  |        |
|                                     | SK    | 17,8      | 1223      | 14       | 36°45'24.87"           | 7°58'19.22" |           |                           |                                  |        |
|                                     | BM    | 17,8      | 1223      | 3        | 36°46'19.11"           | 7°53'50.82" |           | Artificial                | 42                               | 76     |
|                                     | SA    | 17,2      | 947,3     | 15       | 36°48'53.41"           | 7°43'26.72" |           |                           |                                  |        |
|                                     | AS02  | 17,2      | 947,3     | 55       | 36°41'25.24"           | 7°39'07.83" |           |                           |                                  |        |
|                                     | SEB02 | 17,8      | 1223      | 5        | 36°50'22.97"           | 8°03'49.15" |           |                           |                                  |        |

T: temperature; R: rainfall; A: altitude; AM: Ain Makhoulf; CH: Chorfa; AS: Ain sayed; SA: Sidi Amar; SK: Sidi kassi; BM: Ben Mhidi; SEB: Sebaa

**Supplementary Table S2.** Corresponding description and location of the wing and landmark positions in

*Cs. Longiareolata*.

| Landmarks | Description of the landmarks          |
|-----------|---------------------------------------|
| 1         | Radial sector                         |
| 2         | Intersection of costa                 |
| 3         | Distal end of radius                  |
| 4         | Radial branch 2                       |
| 5         | Radial branch 3                       |
| 6         | Distal end of radial branches 4 and 5 |
| 7         | Distal end of media 1 and 2           |
| 8         | Distal end of media 3 and 4           |
| 9         | Distal end of cubital vein 1          |
| 10        | Distal end of cubital vein 2          |
| 11        | Anal vein                             |
| 12        | Origin of cubital 1                   |
| 13        | Midpoint branch of cubital 3          |
| 14        | Medio-cubital cross vein              |
| 15        | Midpoint branch of medial vein        |
| 16        | Radio-sectoral vein                   |
| 17        | Radio-medial cross vein               |
| 18        | Midpoint branch of radial vein        |
| 19        | Origin of radius branches 2 and 3     |

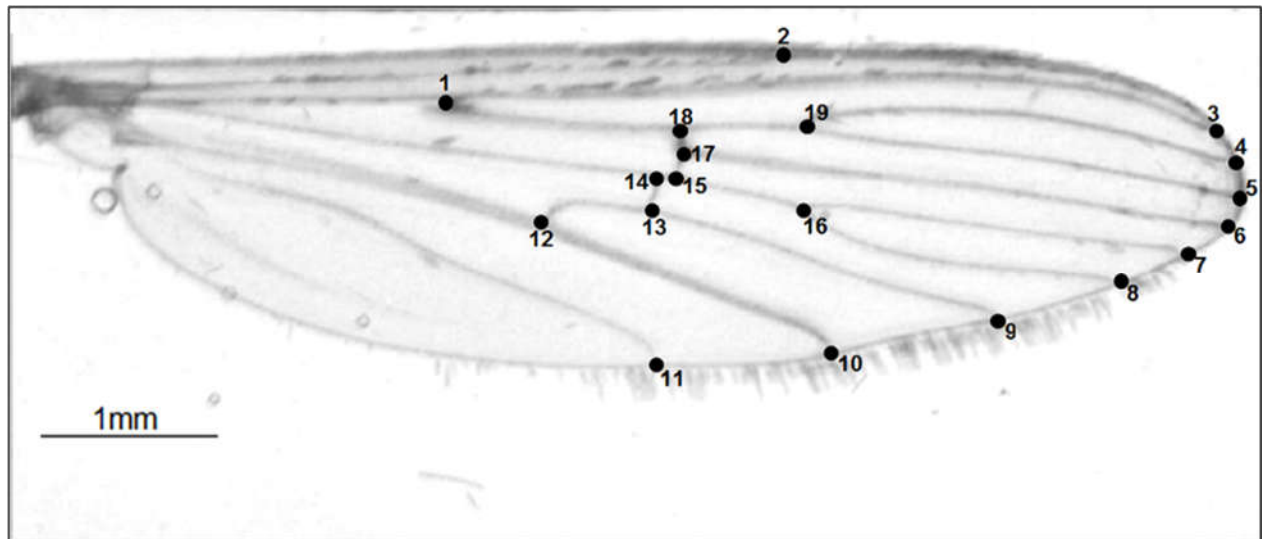

**Supplemental Figure S1.** Digitization of 19 landmarks of the right wing of a female *Culiseta longiareolata* using software Tps-Dig2 2.31.
